# Supplementary material for: Reproduction and community structure of fish from winter catch sites from industrial shrimp bycatch from the northeast and southeast Mexican Pacific
Source: PeerJ. 2018 Mar 2;6:e4460. doi: 10.7717/peerj.4460 (PMC5836567; doi:10.7717/peerj.4460)
Supplement: Data S1 — Diversity sheet shows the global data, for all species and stations. Besides relative density, relative frequency and IVI calculations. Stations sheets shows the species presence/absence, as well the abundance, total length, weight and maturity of each specie at that station. Graphics sheet summarizes the female/male proportion and the mature/immature proportion for each species. Froese and Binohlan sheet shows the calculation of Lm from the maximum length from FishBase.org. [file peerj-06-4460-s001.xlsx]

## Sheet: Explanation
	This file contains the global information from all sampled stations
	Diversity sheet shows the global data, for all species and stations. Besides Relative density, relative frequency and IVI calculations
	Stations sheet shows the species presence/absence, as well the abundance, total length, weight and maturity of each specie at that station.
	Graphics sheet summarizes the famale/male proportion and the mature/immature proportion for each species
	Froese and Binohlan sheet shows the calculation of Lm from the maximum length from FishBase.org.

## Sheet: Diversity
		Station								RD= Relative Density			RF= Relative Frequency					IVI= Importance Value Index
	Sampled Month	F	J	J	F	J	M	M		J: January			F: February					M: March
Family	Specie	S1	S2	S3	S4	S5	S6	S7		Total abundance	RD	RF		IVI			Family	Specie	Frequency	RD	RF	IVI
Achiridae	Achirus mazatlanus		1		1	1		1		4	0.282885	57.14		57.4229		1	Mullidae	Pseudupeneus grandisquamis	HF	28.1471	100	128.147		A)			Station
Engraulidae	Anchoa walkeri					3				3	0.212164	14.28		14.4922		2	Paralichthyidae	Paralichthys woolmani	HF	22.6308	100	122.631					1	2	3	4	5	6	7	Global
Paralichthyidae	Ancylopsetta dendritica					1				1	0.0707214	14.28		14.3507		3	Lutjanidae	Lutjanus peru	HF	15.0636	100	115.064		Species Richness (S)			16	15	15	13	16	16	17	37
Ariidae	Bagre pinnimaculatus	1								1	0.0707214	14.28		14.3507		4	Gerreidae	Diapterus peruvianus	HF	8.91089	100	108.911		Diversity (H´)			1.9472	2.0239	2.118	1.5683	2.0851	2.2355	1.5808	2.218
Sciaenidae	Bairdiella armata					1				1	0.0707214	14.28		14.3507		5	Tetraodontidae	Sphoeroides pachygaster	HF	5.16266	85.71	90.8727
Balistidae	Balistes polylepis		1	1				1		3	0.212164	42.85		43.0622		6	Haemulidae	Pomadasys panamensis	HF	4.80905	85.71	90.5191		B)			Station
Gobiidae	Bollmannia stigmatura						2			2	0.141443	14.28		14.4214		7	Carangidae	Chloroscombrus orqueta	HF	1.13154	85.7	86.8315					1	2	3	4	5	6	7
Bothidae	Bothus constellatus						1	1		2	0.141443	28.57		28.7114		8	Synodontidae	Synodus scituliceps	F	2.26308	71.42	73.6831			Station	1		75.3658	62.0712	65.751	53.9083	69.487	93.37
Bythitidae	Brotula clarkae			1						1	0.0707214	14.28		14.3507		9	Triglidae	Prionotus horrens	F	0.848656	71.42	72.2687				2	75.3658		57.3778	96.7758	49.7	56.59	55.6576
Carangidae	Caranx otrynter	1					2			3	0.212164	28.57		28.7822		10	Fistulariidae	Fistularia corneta	F	0.777935	71.42	72.1979				3	62.0712	57.3778		47.4647	54.137	79.5241	60.98
Chaetodontidae	Chaetodon humeralis							3		3	0.212164	14.28		14.4922		11	Serranidae	Diplectrum macropoma	F	2.82885	57.14	59.9689				4	65.751	96.7758	47.4647		41.2871	39.2378	47.8118
Carangidae	Chloroscombrus orqueta	1	2	1	3	6		3		16	1.13154	85.7		86.8315		12	Achiridae	Achirus mazatlanus	F	0.282885	57.14	57.4229				5	53.9083	49.7	54.137	41.2871		80.3248	44.3314
Gerreidae	Diapterus peruvianus	13	9	3	15	49	26	11		126	8.91089	100		108.911		13	Batrachoididae	Nautopaedium porosissimum	F	0.242885	57.14	57.4229				6	69.487	56.59	79.5241	39.2378	80.3248		62.7956
Serranidae	Diplectrum macropoma	8	6			3	23			40	2.82885	57.14		59.9689		14	Ophichthidae	Ophichthus triserialis	F	0.282885	42.85	43.1329				7	93.37	55.6576	60.98	47.8118	44.3314	62.7956
Fistulariidae	Fistularia corneta	1	5		2	2		1		11	0.777935	71.42		72.1979		15	Balistidae	Balistes polylepis	LF	0.212164	42.85	43.0622
Sciaenidae	Isopisthus remifer					2	3			5	0.353607	28.57		28.9236		16	Sciaenidae	Larimus argenteus	LF	0.212164	42.85	43.0622		C)					Month
Sciaenidae	Larimus argenteus	1				1	1			3	0.212164	42.85		43.0622		17	Carangidae	Selene brevoortii	LF	0.85	28.57	29.42							J	F	M
Ophidiidae	Lepophidium prorates	4					2			6	0.424328	28.57		28.9943		18	Ophidiidae	Lepophidium prorates	LF	0.424328	28.57	28.9943					Month	J		83.25	76.35
Lutjanidae	Lutjanus peru	21	61	11	91	8	7	14		213	15.0636	100		115.064		19	Sciaenidae	Isopisthus remifer	LF	0.353607	28.57	28.9236						F	85.25		75.22
Batrachoididae	Nautopaedium porosissimum			1	1		1	6		9	0.636492	57.14		57.7765		20	Clupeidae	Opisthonema libertate	LF	0.282885	28.57	28.8529						M	76.35	75.22
Ophichthidae	Ophichthus triserialis			1	1			2		4	0.282885	42.85		43.1329		21	Carangidae	Caranx otrynter	LF	0.212164	28.57	28.7822
Clupeidae	Opisthonema libertate			1		3				4	0.282885	28.57		28.8529		22	Bothidae	Bothus constellatus	LF	0.141443	28.57	28.7114
Paralichthyidae	Paralichthys woolmani	24	24	44	22	36	74	96		320	22.6308	100		122.631		23	Cynoglossidae	Symphurus prolatinaris	LF	0.141443	28.57	28.7114
Polynemidae	Polydactylus opercularis							13		13	0.919378	14.28		15.1994		24	Carangidae	Trachinotus kennedyi	LF	0.14	28.57	28.71
Haemulidae	Pomadasys panamensis	7	9	3	2	13	34			68	4.80905	85.71		90.5191		25	Tetraodontidae	Sphoeroides testudineus	LF	1.27298	14.28	15.553
Triglidae	Prionotus horrens	1	6	2	1			2		12	0.848656	71.42		72.2687		26	Polynemidae	Polydactylus opercularis	LF	0.919378	14.28	15.1994		A)			Station
Mullidae	Pseudupeneus grandisquamis	67	31	19	36	12	36	197		398	28.1471	100		128.147		27	Scorpaenidae	Scorpaena sonorae	LF	0.424328	14.28	14.7043					1	2	3	4	5	6	7
Scorpaenidae	Scorpaena sonorae						6			6	0.424328	14.28		14.7043		28	Tetraodontidae	Sphoeroides annulatus	LF	0.212164	14.28	14.49		Species Richness (S)			16	15	15	13	16	16	17
Carangidae	Selene brevoortii			1				2		3	0.212164	28.57		28.7822		29	Chaetodontidae	Chaetodon humeralis	LF	0.212164	14.28	14.4922		Diversity (H´)			1.9472	2.0239	2.118	1.5683	2.0851	2.2355	1.5808
Tetraodontidae	Sphoeroides annulatus		3							3	0.212164	14.28		14.4922		30	Engraulidae	Anchoa walkeri	LF	0.2121	14.28	14.49
Tetraodontidae	Sphoeroides pachygaster	6	5	36	6		17	3		73	5.16266	85.71		90.8727		31	Gobiidae	Bollmannia stigmatura	LF	0.14	14.28	14.42
Tetraodontidae	Sphoeroides testudineus							18		18	1.27298	14.28		15.553		32	Haemulidae	Xenichthys xanti	LF	0.14	14.28	14.42		B)			Station
Sphyraenidae	Sphyraena guachancho		1							1	0.0707214	14.28		14.3507		33	Ariidae	Bagre pinnimaculatus	R	0.0707214	14.28	14.3507					1	2	3	4	5	6	7
Cynoglossidae	Symphurus prolatinaris	1	1							2	0.141443	28.57		28.7114		34	Sciaenidae	Bairdiella armata	R	0.0707214	14.28	14.3507			Station	1		0.753658	0.620712	0.65751	0.539083	0.69487	0.9337
Synodontidae	Synodus scituliceps	2	2			6	17	5		32	2.26308	71.42		73.6831		35	Bythitidae	Brotula clarkae	R	0.0707214	14.28	14.3507				2	0.753658		0.573778	0.967758	0.497	0.5659	0.556576
Carangidae	Trachinotus kennedyi				2					2	0.141443	28.57		28.7114		36	Paralichthyidae	Ancylopsetta dendritica	R	0.0707214	14.28	14.3507				3	0.620712	0.573778		0.474647	0.54137	0.795241	0.6098
Haemulidae	Xenichthys xanti	2								2	0.141443	14.28		14.4214		37	Sphyraenidae	Sphyraena guachancho	R	0.0707214	14.28	14.3507				4	0.65751	0.967758	0.474647		0.412871	0.392378	0.478118
																										5	0.539083	0.497	0.54137	0.412871		0.803248	0.443314
	Abundance per station	161	167	125	183	147	252	379	Global abundance	1414																6	0.69487	0.5659	0.795241	0.392378	0.803248		0.627956
	Species Richness	16	15	15	13	16	16	17																		7	0.9337	0.556576	0.6098	0.478118	0.443314	0.627956
																								C)					Month
																													January	Febrary	March
																											Month	January		0.8325	0.7635
																												Febrary	0.8525		0.7522
																												March	0.7635	0.7522

## Sheet: Station1
	Specie	TL (cm)	Weigth (g)		Maturity	Sex	Stage
	Achirus mazatlanus	Absent at this station
	Anchoa walkeri	Absent at this station
	Ancylopsetta dendritica	Absent at this station
	Bagre pinnimaculatus	23	264		Immature
	Bairdiella armata	Absent at this station
	Balistes polylepis	Absent at this station
	Bollmannia stigmatura	Absent at this station
	Bothus constellatus	Absent at this station
	Brotula clarkae	Absent at this station
	Caranx otrynter
		4.7	1.33		Immature
	Chaetodon humeralis	Absent at this station
	Chloroscombrus orqueta	Organism incomplete
	1 incomplete
	Diapterus perivianus
		15.4	46.53		Developed gonad	female	S1
		11.3	20.55		Immature
		10.4	16.1		Immature
		10.9	18.66		Immature
		11.5	19.6		Immature
		10.5	17.47		Immature
		10.1	15.44		Immature
		10.3	13.32		Immature
		9.9	12.33		Immature
		10.7	17.63		Immature
		10.5	15.57		Immature
		10	13.48		Immature
		10	13.92		Immature
	Diplectrum macropoma	18.1	70.3		Developed gonad	Female	S3
		13.9	30		Immature
		13.2	27.49		Immature
		12.8	23.73		Immature
		10.2	12.25		Immature
		13.5	25.18		Immature
		13	28.14		Immature
		11.5	14.32		Immature
	Fistularia corneta
		24.9	4.89		Immature
	Isopisthus remifer	Absent at this station
	Larimus argenteus
		16.1	51.66		Developed gonad	female	S2
	Lepophidium prorates
	1 incomplete	16	14.35		Immature
		13.1	7.63		Immature
		19.5	2.97		Immature
		9.5	2.45		Immature
	Lutjanus peru	Lt	Peso
		12.5	23.77		Immature
		10	13.23		Immature
		10	15.65		Immature
		9.2	9.29		Immature
		9.5	12.05		Immature
		10.5	12.98		Immature
		11.3	17.26		Immature
		10.3	12.1		Immature
		11.5	19.97		Immature
		10.1	12.54		Immature
		11.9	21.14		Immature
		11.7	21.08		Immature
		12.5	23.5		Immature
		10	11.82		Immature
		13.3	28.52		Immature
		14.3	35.08		Immature
		10.9	15.55		Immature
		11.1	18.88		Immature
		11.3	16.22		Immature
		10.6	13.36		Immature
		10.5	13.09		Immature
	Nautopaedium porosissimum	Absent at this station
	Ophichthus triserialis	Absent at this station
	Opisthonema libertate	Absent at this station
	Paralichthys woolmani	16.15	36.6		Immature
	7 incomplete	8.7	5.9		Immature
		9.4	15.61		Immature
		9.1	6.09		Immature
		11.9	11.54		Immature
		14.7	28.73		Immature
		8.5	7.89		Immature
		9.9	6.41		Immature
		9.6	6.45		Immature
		7.9	2.89		Immature
		9.2	4.15		Immature
		7.5	2.52		Immature
		13.3	18.7		Immature
		8.8	5.72		Immature
		7.7	2.71		Immature
		8.7	4.88		Immature
		9.5	5.83		Immature
	Polydactylus opercularis	Absent at this station
	Pomadasys panamensis
		11.5	21.52		Immature
		12.1	28.23		Immature
		7.9	7.66		Immature
		11.6	25.08		Immature
		10.5	17.1		Immature
		13.7	29.2		Immature
		8.5	8.68		Immature
	Prionotus horrens
	1 inomplete	4	0.93		Immature
	Pseudupeneus grandisquamis	Lt	Peso
	67 incomplete	16.5	52.86		Developed gonad	female	S1
		16.5	62.61		Developed gonad	female	S2
		16.2	55.16		Developed gonad	female	S1
		15.6	47.34		Developed gonad	female	S1
		15.3	40.95		Developed gonad	female	S2
		16.3	67.77		Developed gonad	female	S2
		16	56.18		Developed gonad	male	S3
		12.3	26.34		Immature
		11	15.67		Immature
		11.3	17.9		Immature
		14	29.2		Immature
		11.1	17.63		Immature
		12.2	23.51		Immature
		14.7	40.17		Immature
		12.6	22.84		Immature
		13.9	34.14		Immature
		9.9	12.29		Immature
		13.7	27.23		Immature
		13.4	27.65		Immature
		13.2	26.97		Immature
		12.7	23.56		Immature
		13.6	32.92		Immature
		11.1	16.07		Immature
		16.4	69.5		Immature
		12.6	24.35		Immature
	Scorpaena sonorae	Absent at this station
	Selene brevoortii	Absent at this station
	Sphoeroides annulatus	Absent at this station
	Sphoeroides pachygaster	10	16.42		Immature
		11.7	30.44		Immature
		10.2	21.18		Immature
		9.3	13.84		Immature
		8.4	11.2		Immature
		9.1	16.14		Immature
	Sphoeroides testudineus	Absent at this station
	Sphyraena guachancho	Absent at this station
	Symphurus prolatinaris
		11.9	14.38		Immature
	Synodus scituliceps
	1 incomplete	24.1	82.73		Developed gonad	female	Est1
		29	129.54		Developed gonad	female	Es4
	Trachinotus kennedyi	Absent at this station
	Xenichthys xanti	17.8	69.01		Developed gonad	Male	S1
		13.5	30.1		Immature

## Sheet: Station2
	Specie	TL (cm)	Weigth (g)		Maturity	Sex	Stage
	Achirus mazatlanus	11.6	23.04		Developed gonad	female	S1
	Ancylopsetta dendritica	Absent at this station
	Bagre pinnimaculatus	Absent at this station
	Bairdiella armata	Absent at this station
	Balistes polylepis	6.4	7.54		Immature
	Bollmannia stigmatura	Absent at this station
	Bothus constellatus	Absent at this station
	Brotula clarkae	Absent at this station
	Caranx otrynter	Absent at this station
	Chaetodon humeralis	Absent at this station
	Chlorochrombus orqueta	15.5	8.73		Developed gonad	male	S1
		9.5	11.52		Immature
	Diapterus peruvianus	18.5	71.13		Developed gonad	female	S3
		17.1	69.13		Developed gonad	female	S1
		15.5	39.04		Developed gonad	female	S1
		15.7	20.1		Developed gonad	male	S1
		17.6	70.5		Developed gonad	male	S1
		10.5	13.49		Immature
		10.2	16.15		Immature
		10.3	16.3		Immature
		10.1	17		Immature
		10.6	18.09		Immature
	Diplectrum macropoma	14.4	31.14		Developed gonad	female	S2
		13.9	28.12		Immature
		12.2	20.23		Immature
		13.5	25.7		Immature
		13.5	26.3		Immature
		13.6	26.74		Immature
	Fistularia corneta	33.5	8.7		Immature
	3 incomplete	33	10.68		Immature
		32	13.8		Immature
		31	10.84		Immature
		30	10.16		Immature
	Isopisthus remifer	Absent at this station
	Larimus argenteus	Absent at this station		Absent at this station
	Lepophidium prorates	Absent at this station
	Lutjanus peru	12.3	23.68		Immature
	36 incomplete	15.1	41.05		Immature
		13.1	28.19		Immature
		14.3	36.9		Immature
		12.5	24.57		Immature
		15	39.44		Immature
		14.9	29.88		Immature
		17.7	68.4		Immature
		13.5	31.79		Immature
		13.5	30.54		Immature
		17.9	59.54		Immature
		12.1	20.12		Immature
		17	21.15		Immature
		15.9	46.5		Immature
		11.5	17.55		Immature
		16.7	60.3		Immature
		13.7	34.69		Immature
		14.1	38.64		Immature
		14.5	34.34		Immature
		13.8	26.88		Immature
		15.8	49.13		Immature
		12.8	29.75		Immature
		13.2	26.97		Immature
		18.7	73.1		Immature
		17.1	67.91		Immature
	Nautopaedium porosissimum	Absent at this station
	Ophichthus triserialis	Absent at this station
	Opisthonema libertate	Absent at this station
	Paralichthys woolmani	10.5	8.5		Immature
	2 incomplete	10.3	7.34		Immature
		11.9	13.6		Immature
		8	4.64		Immature
		9.3	5.7		Immature
		15.8	39.23		Immature
		16.6	43.56		Immature
		9.1	5.94		Immature
		9	6.3		Immature
		11.4	13.9		Immature
		10.5	8.4		Immature
		11.8	16.31		Immature
		9.7	6.22		Immature
		7.3	3		Immature
		9.3	6.72		Immature
		10.5	10.1		Immature
		10.3	8.11		Immature
		7.3	2.35		Immature
		10.6	10.94		Immature
		15.6	31.4		Immature
		12.1	13.8		Immature
		10	9.72		Immature
		9.6	6.71		Immature
		11.2	12.14		Immature
	Polydactylus opercularis	Absent at this station
	Pomadasys panamensis	11.5	21.8		Immature
		13.6	3.55		Immature
		10.5	16.28		Immature
		10.6	1843		Immature
		10	13		Immature
		13.8	32.8		Immature
		10.5	15.31		Immature
		9.6	11.93		Immature
		13.9	38.7		Immature
	Prionotus horrens	13	21.5		Immature
		11.7	12,89		Immature
	3 incomplete	5.4	2.17		Immature
	Pseudupeneus grandisquamis	17	58.4		Developed gonad	female	S2
	6 incomplete	15.3	42.73		Developed gonad	female	S1
		15.6	46.88		Developed gonad	female	S1
		12.9	21.2		Immature
		11.1	16.3		Immature
		8.9	8.08		Immature
		12.4	20.94		Immature
		9.8	8.6		Immature
		12.2	21.12		Immature
		11.5	14.9		Immature
		10	12.15		Immature
		8.9	7.8		Immature
		13.8	29.18		Immature
		8.1	5.84		Immature
		10.1	11.4		Immature
		9.9	10.15		Immature
		16	47.7		Immature
		12.4	20.4		Immature
		11.1	15.9		Immature
		10.6	12.7		Immature
		11	14.2		Immature
		11.5	16.89		Immature
		13.6	30.9		Immature
		12.4	25.66		Immature
		10.7	14.44		Immature
	Scorpaena sonorae	Absent at this station
	Selene brevoortii	Absent at this station
	Sphoeroides annulatos	12.3	27.26		Immature
		14.3	58.43		Immature
		13	32.34		Immature
	Sphoeroides pachygaster	9	14.6		Immature
		8.5	11.79		Immature
		9.5	19.46		Immature
		9.3	13.5		Immature
		9.8	18.58		Immature
	Sphoeroides testudineus	Absent at this station
	Sphyraena guachancho	17	51		Immature
	Symphurus prolatinaris	11.6	23.04		Developed gonad	male	S1
		14.9	24.52		Developed gonad	female	S2
	Synodus scituliceps	8.9	7.79		Immature
	1 incomplete
	Trachinotus kennedyi	Absent at this station

## Sheet: Station3
	Specie	TL (cm)	Weigth (g)		Maturity	Sex	Stage
	Achirus mazatlanus	Absent at this station
	Anchoa walkeri	Absent at this station
	Ancylopsetta dendritica	Absent at this station
	Bagre pinnimaculatus	Absent at this station
	Balistes polylepis	6.2	6.43		Immature
	Bollmannia stigmatura	Absent at this station
	Bothus constellatus	Absent at this station
	Bairdiella armata	Absent at this station
	Brotula clarkae	19.1	50.11		Immature
	Caranx otrynter	Absent at this station
	Chaetodon humeralis	Absent at this station
	Chloroscombrus orqueta	18.2	54.66		Developed gonad	Hermbra	S3
	Diapterus perivianus	16.9	61.7		Developed gonad	female	S1
		15.1	47.2		Developed gonad	male	S1
		18.9	88.7		Developed gonad	female	E4
	Diplectrum macropoma	Absent at this station
	Fistularia corneta	30	8.37		Immature
	Isopisthus remifer	Absent at this station
	Larimus argenteus	Absent at this station
	Lepophidium prorates	Absent at this station
	Lutjanus peru	14	32.9		Immature
		18.9	91.8		Immature
		15.4	48.22		Immature
		13.3	35.2		Immature
		10.9	18.2		Immature
		12.2	25.2		Immature
		10.4	16.25		Immature
		7.4	6.3		Immature
		12.3	25.5		Immature
		14.2	37.05		Immature
		13	30.15		Immature
	Nautopaedium porosissimum	16.6	40.75		Immature
	Ophichthus triserialis	28.9	32.2		Immature
	Paralichthys woolmani	10.4	8.25		Immature
	44 incomplete	11.8	15.92		Immature
		11.5	16.03		Immature
		11.9	16.5		Immature
		12.5	20.81		Immature
		15	27.9		Immature
		13.2	22.14		Immature
		15.4	30.32		Immature
		11.8	17.65		Immature
		12.6	19		Immature
		13.5	26.24		Immature
		12.4	19.15		Immature
		11.7	15.25		Immature
		15.8	32.22		Immature
		12.7	20.16		Immature
		9	6.2		Immature
		11.9	17.5		Immature
		12.4	18.7		Immature
		11.7	15.18		Immature
		13.1	21		Immature
		13.8	20.37		Immature
		11.7	21.04		Immature
		19.3	65		Immature
		11.9	22		Immature
		22.9	108.8		Immature
	Polydactylus opercularis	Absent at this station
	Pomadasys panamensis	12.7	30.58		Immature
		11.4	22.16		Immature
		10.6	18.71		Immature
	Prionotus horrens	11.7	17.6		Immature
		6.1	5.3		Immature
	Pseudupeneus grandisquamis	11.9	22.9		Immature
	1 incomplete	11.9	19.13		Immature
		12.5	22.85		Immature
		12.2	22.1		Immature
		13.1	26.2		Immature
		12.4	22.2		Immature
		12.5	23.3		Immature
		11.6	18.47		Immature
		10.3	12.51		Immature
		10.5	13.1		Immature
		10.8	16.42		Immature
		11.4	17.86		Immature
		11.3	18.4		Immature
		10.4	12.37		Immature
		7.1	4.2		Immature
		10.7	16.31		Immature
		11.1	17.8		Immature
		10.4	12.92		Immature
	Scorpaena sonorae	Absent at this station
	Selene brevoortii	22.3	122		Developed gonad	S2
	Sphoeroides annulatus	Absent at this station
	Sphoeroides pachygaster	10.1	23.56		Immature
	18 incomplete	6.4	5.2		Immature
		9.3	18		Immature
		14.2	62		Immature
		6.6	15.2		Immature
		6.5	16.6		Immature
		8.5	12.34		Immature
		5.3	5.7		Immature
		8.2	31.2		Immature
		7.9	10.9		Immature
		7.1	6.7		Immature
		13	30.85		Immature
		6.9	8.45		Immature
		6.8	8.04		Immature
		8.9	18.95		Immature
		6.1	7.3		Immature
		8.4	13.45		Immature
		6.5	12.5		Immature
	Sphoeroides testudineus	Absent at this station
	Sphyraena guachancho	Absent at this station
	Symphurus prolatinaris	Absent at this station
	Synodus scituliceps	Absent at this station
	Trachinotus kennedyi	Absent at this station
	Xenichthys xanti	Absent at this station

## Sheet: Station4
	Specie	TL (cm)	Weigth (g)		Maturity	Sex	Stage
	Achirus mazatlanus	9.2	12.8		Immature
	Anchoa walkeri	Absent at this station
	Ancylopsetta dendritica	Absent at this station
	Bagre pinnimaculatus	Absent at this station
	Bairdiella armata	Absent at this station
	Balistes polylepis	Absent at this station
	Bollmannia stigmatura	Absent at this station
	Bothus constellatus	Absent at this station
	Brotula clarkae	Absent at this station
	Caranx otrynter	Absent at this station
	Chaetodon humeralis	Absent at this station
	Chlorocrombus orcheta	16.2	30		Developed gonad	female	S2
		14	25.4		Immature
		13.8	207		Immature
	Diapterus peruvianus	11.7	15		Immature
	4 incomplte	10.7	13		Immature
		10.9	18.45		Immature
		11.1	16.6		Immature
		12.7	24.4		Immature
		10.5	13.5		Immature
		10.2	11.6		Immature
		11.3	19.4		Immature
		11	17.5		Immature
		10.6	13.2		Immature
		9.8	11.9		Immature
	Diplectrum macropoma	Absent at this station
	Fistularia petimba	35.6	12.5		Immature
		26	6.8		Immature
	Isopisthus remifer	Absent at this station
	Larimus argenteus	Absent at this station
	Lepophidium prorates	Absent at this station
	Lutjanus peru	21.9	122.8		Immature
	66 incomplete	17.4	71.25		Immature
		15.7	50.75		Immature
		10.1	12.5		Immature
		12.5	22.7		Immature
		16.6	57.2		Immature
		11.5	19.7		Immature
		15.4	45.7		Immature
		14.9	40.6		Immature
		13	25.3		Immature
		13.5	27.5		Immature
		12.6	23.8		Immature
		15	43.12		Immature
		14.9	40.17		Immature
		13.7	35		Immature
		12.5	21.5		Immature
		14.4	41.2		Immature
		21.2	114.65		Immature
		14.9	42.93		Immature
		12.7	23		Immature
		10.2	13.5		Immature
		18.4	82.15		Immature
		14.4	34.65		Immature
		12.9	27.5		Immature
		14.8	36.9		Immature
	Nautopaedium porosissimum	19.7	82.5		Immature
	Ophichthus triserialis	62	330		Immature
	Opisthonema libertate	Absent at this station
	Paralichthys woolmani	13.7	125.5		Immature
	5 incomplete	11.5	13.1		Immature
		12	14.45		Immature
		11.4	8.26		Immature
		9.5	6		Immature
		9.9	7		Immature
		10.4	8.2		Immature
		16	29.5		Immature
		10.4	9.15		Immature
		8.2	3.5		Immature
		9.5	6		Immature
		10.9	11.3		Immature
		10.5	7		Immature
		10.3	9.7		Immature
		9.5	6.7		Immature
		9.8	5.9		Immature
		11.7	9.1		Immature
	Polydactylus opercularis	Absent at this station
	Pomadasys panamensis	14.4	40.74		Developed gonad	female	S1
		14	38.2		Developed gonad	female	S1
	Prionotus horrens	6.9	15.52		Immature
	Pseudupeneus grandisquamis	16.7	57.6		Developed gonad	female	S2
	11 incomplete	16.8	60.3		Developed gonad	female	S1
		17.2	68.7		Developed gonad	female	S1
		15.4	48.2		Developed gonad	female	S2
		18.5	75		Developed gonad	male	S3
		13	28.25		Immature
		12.6	27.9		Immature
		12.3	20.5		Immature
		11.9	22.3		Immature
		13.8	33.5		Immature
		13	25.8		Immature
		13.9	27.5		Immature
		12.4	24.5		Immature
		13.8	28.9		Immature
		12.2	20.1		Immature
		13.7	27.17		Immature
		12.4	20.95		Immature
		12.4	21.6		Immature
		13.5	26		Immature
		12.4	25.1		Immature
		12.3	26.2		Immature
		13.2	27		Immature
		12	22.1		Immature
		12.9	26.5		Immature
		12.5	27.6		Immature
	Scorpaena sonorae	Absent at this station
	Selene brevoortii	Absent at this station
	Sphoeroides annulatus	Absent at this station
	Sphoeroides pachygaster	9.4	14.4		Immature
		7.6	7.5		Immature
		9.3	14.5		Immature
		8.6	12.8		Immature
		8.4	10.9		Immature
		7.4	9		Immature
	Sphoeroides testudineus	Absent at this station
	Sphyraena guachancho	Absent at this station
	Symphurus prolatinaris	Absent at this station
	Synodus scituliceps	Absent at this station
	Trachinotus kennedyi	7.2	6		Immature
		19			Immature
	Xenichthys xanti	Absent at this station

## Sheet: Station5
	Specie	TL (cm)	Weigth (g)		Maturity	Sex	Stage
	Achirus mazatlanus	9.4	13.59		Immature
	Anchoa walkeri	13.5	19.43		Maudro	female	E4
		12	17.5		Maudro	female	E4
		6.8	8.6		Immature
	Ancylopsetta dendritica	9.4	7.36		Immature
	Bagre pinnimaculatus	Absent at this station
	Bairdiella armata	18.8	62.44		Immature
	Balistes polylepis	Absent at this station
	Bollmannia stigmatura	Absent at this station
	Bothus constellatus	Absent at this station
	Brotula clarkae	Absent at this station
	Caranx otrynter	Absent at this station
	Chaetodon humeralis	Absent at this station
	Chloroscombrus orqueta	18	46.6		Developed gonad	female	S3
	1 incomplete	15.8	32.7		Developed gonad	male	S1
		13.3	22.26		Immature
		14.7	24.4		Immature
		13.7	18.44		Immature
	Diapterus peruvianus	14.3	41.03		Developed gonad	female	S1
	24 incomplete	15.6	48.75		Developed gonad	male	S2
		12.4	26.03		Immature
		12.3	28.82		Immature
		10.2	16.75		Immature
		9.8	17.29		Immature
		10.3	19.1		Immature
		9.3	12.51		Immature
		11.5	22.03		Immature
		11	18.03		Immature
		11.6	22.91		Immature
		10.5	12.5		Immature
		11.1	20.2		Immature
		10	14.34		Immature
		11.8	24.24		Immature
		10.3	18.8		Immature
		11.3	18.6		Immature
		10.9	16.46		Immature
		9.6	15.18		Immature
		10.1	13.75		Immature
		9.6	12.03		Immature
		10	13.64		Immature
		9.8	14.95		Immature
		9.9	12.34		Immature
		9.4	15.42		Immature
	Diplectrum macropoma	14.6	34.1		Developed gonad	female	S2
		12.1	21.37		Immature
		13.4	26.43		Immature
	Fistularia corneta	24.5	3.74		Immature
		28.9	5.24		Immature
	Isopisthus remifer	19.3	72.5		Developed gonad	female	E 1
		14.8	35.6		Immature
	Larimus argenteus	17.2	55.3		Developed gonad	male	S1
	Lepophidium prorates	Absent at this station
	Lutjanus peru	11.6	24.71		Immature
		12.6	23.62		Immature
		10.6	15.8		Immature
		13.4	31.86		Immature
		9.7	10.6		Immature
		10.4	14.33		Immature
		13	20.42		Immature
		12.1	20.85		Immature
	Nautopaedium porosissimum	Absent at this station
	Ophichthus triserialis	Absent at this station
	Opisthonema libertate	Absent at this station
	Paralichthys woolmani	10	8.9		Immature
	12 incomplete	12.7	14.4		Immature
		8.9	5.58		Immature
		11.6	12		Immature
		11.3	13.08		Immature
		12	15.55		Immature
		10.8	10.6		Immature
		12.2	15.37		Immature
		12.3	14.5		Immature
		9.9	7.57		Immature
		12.14	14.15		Immature
		10.2	8.83		Immature
		11.1	11.81		Immature
		11.8	14		Immature
		11.3	13.8		Immature
		11	10		Immature
		7.1	2.64		Immature
		9.6	6.83		Immature
		11.1	13.8		Immature
		10.2	9.45		Immature
		9	5.8		Immature
		10.4	8.67		Immature
		10	9		Immature
	Polydactylus opercularis	Absent at this station
	Pomadasys panamensis	17	37.85		Developed gonad	male	S1
		15.4	55.9		Developed gonad	female	S2
		13.5	36		Developed gonad	female	S1
		13.6	38		Developed gonad	female	S1
		13.9	38.85		Developed gonad	female	S1
		10.6	17.3		Immature
		9.1	11.29		Immature
		10.1	16.3		Immature
		8.9	10.5		Immature
		10.4	18.9		Immature
		8.9	7.25		Immature
		10.1	14.23		Immature
		11.6	22.45		Immature
	Prionotus horrens	Absent at this station
	Pseudopeneus grandisquamis	14.9	33.32		Developed gonad	female	S2
		12.3	24.81		Immature
		13	29.2		Immature
		11.4	21.7		Immature
		10.5	13.27		Immature
		16	47.3		Immature
		13.1	26.47		Immature
		9.6	10.8		Immature
		8.4	5.53		Immature
		9.7	9.22		Immature
		9	8.49		Immature
		10.8	15.35		Immature
	Scorpaena sonorae	Absent at this station
	Selene brevoortii	Absent at this station
	Sphoeroides annulatus	Absent at this station
	Sphoeroides pachygaster	Absent at this station
	Sphoeroides testudineus	Absent at this station
	Sphyraena guachancho	Absent at this station
	Symphurus prolatinaris	Absent at this station
	Synodus scituliceps	14.9	14.53		Immature
		13.1	10.65		Immature
		12.3	8.36		Immature
		18.4	32.1		Immature
		14.9	13.3		Immature
		9.5	3.7		Immature
	Trachinotus kennedyi	Absent at this station
	Xenichthys xanti	Absent at this station
	sardina crinuda	20.2			72.23
		16.9			37.3				sardina crinuda
		16.3			34.43

## Sheet: Station6
	Specie	TL (cm)	Weigth (g)		Maturity	Sex	Stage
	Achirus mazatlanus	Absent at this station
	Anchoa walkeri	Absent at this station
	Ancylopsetta dendritica	Absent at this station
	Bagre pinnimaculatus	Absent at this station
	Bairdiella armata	Absent at this station
	Balistes polylepis	Absent at this station
	Bollmannia stigmatura	10	8.12		Immature
		10.5	10.91		Developed gonad	female	S3
	Bothus constellatus	10	10.52		Immature
	Brotula clarkae	Absent at this station
	Caranx otrynter	7	5.08		Immature
		4.5	1.74		Immature
	Caranx otrynter	Absent at this station
	Chaetodon humeralis	Absent at this station
	Chloroscombrus orqueta	Absent at this station
	Diapterus peruvianus	16	53.82		Developed gonad	female	S3
		16	56.87		Developed gonad	female	S3
		16	56.47		Developed gonad	female	S3
		18	74.75		Developed gonad	female	S3
		15.5	56.68		Developed gonad	female	S2
		15	45.66		Developed gonad	female	S2
		15	42.06		Developed gonad	female	S2
		15	47.83		Developed gonad	female	S1
		15.5	55.64		Developed gonad	female	S1
		14	38.13		Developed gonad	male	S1
		14.5	42.98		Developed gonad	male	S1
		15	40.53		Developed gonad	male	S1
		15	45.97		Developed gonad	male	S1
		14	40.6		Developed gonad	male	S1
		11	24.56		Immature
		9.5	14.48		Immature
		11.5	25.43		Immature
		10	16		Immature
		10	14		Immature
		10	13.52		Immature
		9.5	13.35		Immature
		10	19.26		Immature
		6.5	5.98		Immature
		9	10.33		Immature
		9.5	13.7		Immature
	Diplectrum macropoma	17.5	52.1		Developed gonad	female	S2
		16	44.32		Developed gonad	male	S3
		15	46.05		Developed gonad	female	S2
		14.5	36.87		Developed gonad	female	S2
		14	31.23		Developed gonad	male	S4
		14	30.91		Developed gonad	female	S3
		14	36.7		Immature	inm
		14	27.87		Immature
		13.5	25.86		Immature
		13.5	25.32		Immature
		13.5	29.2		Immature
		13.5	28.14		Immature
		13.5	27.68		Immature
		13	28.42		Immature
		13	28.15		Immature
		13	25.3		Immature
		13	25.95		Immature
		13	28.2		Immature
		12.5	23.7		Immature
		12	16.78		Developed gonad	male	S3
		12	18.94		Immature
		10.5	14.66		Immature
	Fistularia corneta	Absent at this station
	Isophisthus remifer	20	82.64		Developed gonad	female	S1
		19	58.9		Immature
		19	71.79		Developed gonad	female	S2
	Larimus argenteus	16.2			Developed gonad	male	S1
		14.5			Immature
	Lepophidium prorates	38.24			Immature	inm
		4.87			Immature	inm
	Lutjanus peru	17.5	69.32		Immature	inm
		15	46.23		Immature	inm
		14	34.74		Immature	inm
		13	29.26		Immature	inm
		11.5	18.5		Immature	inm
		13.5	31.72		Immature	inm
		16.5	59.54		Immature	inm
	Nautopaedium porosissimum	16.8	44.22		Immature	inm
	Ophichthus triserialis	Absent at this station
	Opisthonema libertate	Absent at this station
	Paralichthys woolmani	27.5	300		Developed gonad	female	S3
		25.5	180.36		Immature
		26	172.9		Mature	female	S2
		24.5	148.44		Developed gonad
		12.5	19.78		Immature
		13	20.93		Immature
		12.5	19.45		Immature
		19	63.9		Immature
		18	46.3		Immature
		14	25.8		Immature
		16.5	49		Immature
		24	148.74		Immature
		13	21.4		Immature
		12	14.36		Immature
		12	14.42		Immature
		12.5	14.31		Immature
		10.5	12.25		Immature
		11.5	17.18		Immature
		10.5	10.59		Immature
		13	18.89		Immature
		12	18.26		Immature
		11	12.88		Immature
		14	22.57		Immature
		8.5	7.3		Immature
		9	7.9		Immature
		13	23.11		Immature
	Polydactylus opercularis	22.5	108.44		mature	female	S3
		20.5	89.94		mature	female	S2
	Pomadasys panamensis	14	48		Developed gonad	female	S1
		14.5	52.05		Developed gonad	female	S1
		15	48.71		Developed gonad	female	S2
		14	45		Developed gonad	female	S1
		13	33.33		Developed gonad	female	S1
		13	41.69		Developed gonad	female	S1
		13	35.11		Developed gonad	female	S1
		13.5	42.51		Developed gonad	female	S1
		12.5	33.48		Developed gonad	female	S2
		14	42.37		Immature
		14	47.42		Immature
		10	21.6		Immature
		13	34.34		Immature
		12.5	31.72		Immature
		11	20.94		Immature
		10	13.04		Immature
		14	16.29		Immature
		14.5	52.55		Immature
		13	37.3		Immature
		8.5	9.49		Immature
		8	7.9		Immature
		11	23.97		Immature
		11.5	20.24		Immature
		10	15.72		Immature
		11	21.76		Immature
		4	2		Immature
		10.5	19.94		Immature
	Prionotus horrens	Absent at this station
	Pseudupeneus grandisquamis	14.5	45.84		Developed gonad	female	S1
		16	60.5		Immature
		15	49.12		Developed gonad	female	S2
		8	5.59		Immature
		8.5	8.33		Immature
		8.5	8.8		Immature
		14.58	41.52		Immature
		15.5	47.44		Immature
		13	29.21		Immature
		12	26.8		Immature
		13.5	38.44		Immature
		9	9.54		Immature
		10	11.77		Immature
		10	11.7		Immature
		12.5	26.46		Immature
		10	10.67		Immature
		12	21.62		Immature
		10	14.99		Immature
		9	14.08		Immature
		9	9.83		Immature
		11	17.99		Immature
		10	12.64		Immature
		8	7.2		Immature
	Scorpaena sonorae	9.6	12.1		Developed gonad	female	S3
		9	8.71		Developed gonad	female	S3
		9	11.28		Developed gonad	female	S3
		9	10.78		Developed gonad	female	S3
		9	10.15		Developed gonad	female	S3
		9	11.23		Developed gonad	female	S3
	Selene brevoortii	Absent at this station
	Sphoeroides annulatus	Absent at this station
	Sphoeroides pachygaster	8.7	17.46		Immature
		9.4	18.84		Immature
		6	10.7		Immature
		7.5	8.78		Immature
		5.5	4.36		Immature
		6.6	5.65		Immature
		5.5	3.79		Immature
		7	6.82		Immature
		4.5	1.87		Immature
		8	14.14		Immature
		6.3	6.62		Immature
		7.5	10.55		Immature
		7.5	17.21		Immature
		8.5	11		Immature
		5.5	7.04		Immature
		6	8.83		Immature
		7	7.22		Immature
	Sphoeroides testudineus	Absent at this station
	Sphyraena guachancho	Absent at this station
	Symphurus prolatinaris	Absent at this station
	Synodus scituliceps	30.5	151.28		Developed gonad	female	S4
		24.5	83.95		Developed gonad	female	S1
		24	76.64		Developed gonad	female	S1
		23	74.26		Developed gonad	female	S2
		22	56.31		Developed gonad	female	S3
		22	67.44		Developed gonad	female	S4
		21	52.08		Immature
		20	44.89		Immature
		20	43		Immature
		17	26.43		Immature
		17	26.81		Immature
		16.5	20.78		Immature
		14	13.7		Immature
		12	6.72		Immature
		12	6.9		Immature
		4.5	0.85		Immature
		4	0.95		Immature
	Trachinotus kennedyi	Absent at this station
	Xenichthys xanti	Absent at this station

## Sheet: Station7
	Specie	TL (cm)	Weigth (g)		Maturity	Sex	Stage
	Achirus mazatlanus	12.5	14.2		Developed gonad	female	S2
	Anchoa walkeri	Absent at this station
	Ancylopsetta dendritica	Absent at this station
	Bagre pinnimaculatus	Absent at this station
	Bairdiella armata
	Balistes polylepis	6.2	5.88		Immature
	Bollmannia stigmatura	Absent at this station
	Bothus concetellatus	12.5	14.2		Immature
	Brotula clarkae	Absent at this station
	Caranx otrynter	Absent at this station
	Chaetodon humeralis	5.2	3.92		Immature
		3.4	1.7		Immature
	Chloroscombrus orqueta	14.9	24.34		Immature
		15	29.2		Immature
		15.4	30.38		Immature
	Diapterus peruvianus	8.9	7.74		Immature
	3 incomplete	8.8	8.23		Immature
		8.4	7.3		Immature
		8.1	6.5		Immature
		7.6	5.75		Immature
		7.2	4.37		Immature
		7.3	4.48		Immature
		8.5	8.08		Immature
	Diplectrum macropoma	Absent at this station
	Fistularia corneta	31	15.3		Immature
	Isopisthus remifer	Absent at this station
	Larimus argenteus	Absent at this station
	Lepophidium prorates	Absent at this station
	Lutjanus peru	11.9	23.05		Immature
		9.6	12.26		Immature
		9.9	14.04		Immature
		8.4	8.42		Immature
		8.5	8.72		Immature
		9	9.58		Immature
		7.7	6		Immature
		10	14.04		Immature
		10.5	15.9		Immature
		11.4	20.8		Immature
		7.7	6.41		Immature
		8.8	8.45		Immature
		10.1	14.45		Immature
		11.1	16.82		Immature
	Ophichthus triserialis	12.6	9.41		Immature
		12.7	7.64		Immature
	Nautopaedium porosissimum	8.7	5.6		Immature
	1 incomplete	8	3.62		Immature
		7.8	5.09		Immature
		7.4	3.45		Immature
		7.7	3.52		Immature
	Ophichthus triserialis	Absent at this station
	Opisthonema libertate	Absent at this station
	Paralichthys woolmani	22.3	108.17		Developed gonad	female	S1
	6 incomplete	8	5.26		Immature
		9.2	8.12		Immature
		10.5	11.4		Immature
		10.7	12.3		Immature
		9.5	8.9		Immature
		8.9	6.6		Immature
		10	10.5		Immature
		8	3.92		Immature
		10	10.6		Immature
		10.9	13		Immature
		11.3	19.1		Immature
		9.7	8.5		Immature
		10.1	10.12		Immature
		9	8.7		Immature
		9	6.8		Immature
		9.5	7.6		Immature
		9.5	9.2		Immature
		11.8	19.15		Immature
		10.5	11.6		Immature
		8	4.68		Immature
		10	11.2		Immature
		10.5	10.8		Immature
		9.4	7.26		Immature
		9.2	8.15		Immature
		8.2	6.18		Immature
		9.5	7.9		Immature
		10.6	12.7		Immature
		9.8	8.28		Immature
		10	9.92		Immature
		7.8	5.12		Immature
		10			Immature
		13.5	17.24		Immature
		11.3	14.5		Immature
		9.5	8.31		Immature
		10.7	13.05		Immature
		10.2	9.24		Immature
		10.9	12.7		Immature
		9.6	9.3		Immature
		9.5	7.77		Immature
		11.6	14.4		Immature
		10.7	12.15		Immature
		7.5	3		Immature
		10.5	9.98		Immature
		9.5	8.99		Immature
		12.8	17.9		Immature
		11	12.63		Immature
		9	7		Immature
		10.5	11.25		Immature
		8.5	5.78		Immature
		10	9.4		Immature
		9.2	8.35		Immature
		9.4	8.38		Immature
		10.7	13.25		Immature
		10.8	11.8		Immature
		11	12.8		Immature
		8.3	6.25		Immature
		9.5	9.51		Immature
		10	9.48		Immature
		8.7	5.59		Immature
		10.5	11.45		Immature
		10.6	13		Immature
		8.4	6.29		Immature
		9.3	7.93		Immature
		8.4	9.9		Immature
		11.5	15.31		Immature
		9.9	9.73		Immature
		9	8		Immature
		12	12.4		Immature
		9.1	7.3		Immature
		9.3	8.9		Immature
		8.6	5.8		Immature
		11	12.2		Immature
		8	4.8		Immature
		9.3	7.96		Immature
		9.5	8.7		Immature
		9.4	6.62		Immature
		8	5		Immature
		10.1	10.15		Immature
		8.5	6		Immature
		9.1	7.93		Immature
		9.6	8.9		Immature
		10.4	10.6		Immature
		10.3	10.7		Immature
		9.6	9		Immature
		10.1	11.17		Immature
		10.2	10.7		Immature
		10.4	10.3		Immature
		11.1	13.9		Immature
		9.4	8.2		Immature
		10.2	11.3		Immature
		9.1	8.7		Immature
		9	8.55		Immature
		8	4.53		Immature
		9.8	10.14		Immature
		9.5	8.05		Immature
		9.2	8.02		Immature
	Polydactylus opercularis	18.9	61.47		Developed gonad	female	S2
		16.3	41.58		Immature
		13.4	21.51		Immature
		18.7	58.14		Immature
		17.5	49.32		Immature
		18	57.38		Immature
		16.8	43.59		Immature
		13.7	25.18		Immature
		14.1	23.4		Immature
		18.4	54.52		Immature
		14.6	29.49		Immature
		18.4	58.17		Immature
		16.2	39.16		Immature
	Pomadasys panamensis	Absent at this station
	Prionotus horrens	9.8	12.95		Immature
		8	6.31		Immature
	Pseudopeneus grandisquamis	11.7	20.4		Immature
	172 incomplete	12.1	20.2		Immature
		11.1	17.6		Immature
		11.6	19.16		Immature
		11.9	20.73		Immature
		11.6	18.38		Immature
		11.7	20.4		Immature
		11.5	15.64		Immature
		11.9	20.12		Immature
		11.9	18.87		Immature
		12	21		Immature
		11.5	16.74		Immature
		10.9	12.66		Immature
		11.7	16.6		Immature
		11.5	19.5		Immature
		11.1	15.42		Immature
		10.7	14.31		Immature
		10.7	15.67		Immature
		11.1	15.4		Immature
		10.7	15.2		Immature
		11.4	21.53		Immature
		11.9	21.6		Immature
		11.8	20.8		Immature
		10.9	16.77		Immature
		12.7	25.75		Immature
	Scorpaena sonorae	Absent at this station
	Selene Brevorti	16.8	43.25		Immature
		16.9	45.36		Immature
	Sphoeroides annulatus	Absent at this station
	Sphoeroides pachygaster	5.7	4.3		Immature
		11	27		Immature
		6.2	6.31		Immature
	Sphoeroides testudineus	9.2	13.61		Immature
		8.1	11.5		Immature
		8	8.83		Immature
		8.5	13.8		Immature
		7.8	8.43		Immature
		9.2	16.97		Immature
		10.6	21.95		Immature
		4.7	2.92		Immature
		7.9	9.95		Immature
		9	15.57		Immature
		9.2	15.2		Immature
		7.5	7.83		Immature
		7.6	11.09		Immature
		7	7.07		Immature
		7.9	7		Immature
		8.3	12.74		Immature
		7.6	9.2		Immature
		7	6.57		Immature
	Sphyraena guachancho	Absent at this station
	Symphurus prolatinaris	Absent at this station
	Synodus scituliceps	21.7	54.55		Developed gonad	male	S1
		19.7	42.01		Immature
		16	22.93		Immature
		17	25.7		Immature
		14.8	20.32		Immature
	Trachinotus kennedyi	Absent at this station
	Xenichthys xanti	Absent at this station

## Sheet: Graphics
	Sex proportion (Percentage)
	Female	Male
	F	M
S. guachancho	100	0
S. sonorae	100	0
S. scituliceps	100	0
P. woolmani	100	0
P. panamensis	100	0
P. opercularis	100	0
P. grandisquamis	100	0
L. argenteus	25	75
I. remifer	100	0
D. peruvianus	64.3	35.71
D. macropoma	75	25
C. orqueta	100	0
Bollmannia sp	100	0
A. walkeri	100	0
A. mazatlanus	100	0
	Gonadal development (Percentage)
	Immature	Mature (developed gonad)
	Im	Ma
A. mazatlanus	80	20
A. walkeri	66.67	33.33
B. constellatus	100	0
B. stigmatura	50	50
C. orqueta	87.5	12.5
C. otrynter	100	0
D. macropoma	65.22	34.78
D. peruvianus	80.77	19.23
I. remifer	40	60
L. argenteus	60	40
L. peru	100	0
L. prorates	100	0
N. porosissimum	100	0
P. grandisquamis	86.11	13.89
P. horrens	100	0
P. opercularis	97.3	2.7
P. panamensis	89.48	10.52
P. woolmani	91.9	8.1
S. brevoortii	100	0
S. guachancho	100	0
S. pachygaster	100	0
S. scituliceps	64.81	35.19
S. sonorae	0	100
T. kennedyi	100	0
	1959.76	440.24

[truncated: 1 more sheets: Froese and Binohlan]
